# Supplementary material for: Structural effects on the photophysical properties of mono-β-diketonate and bis-β-diketonate EuIII complexes
Source: Royal Society of Chemistry journal article supplement (doi:10.1039/c5cp01392e), 2015-01-01
Supplement: c5cp01392e1.pdf [file c5cp01392e1.pdf]

## Supporting Information

### Structural effect on photophysical properties of Eu(III) complexes with mono- $\beta$ -diketone and bis- $\beta$ -diketone

Tianyu Zhu, Peng Chen, Hongfeng Li,\* Wenbin Sun, Ting Gao, Pengfei Yan\*

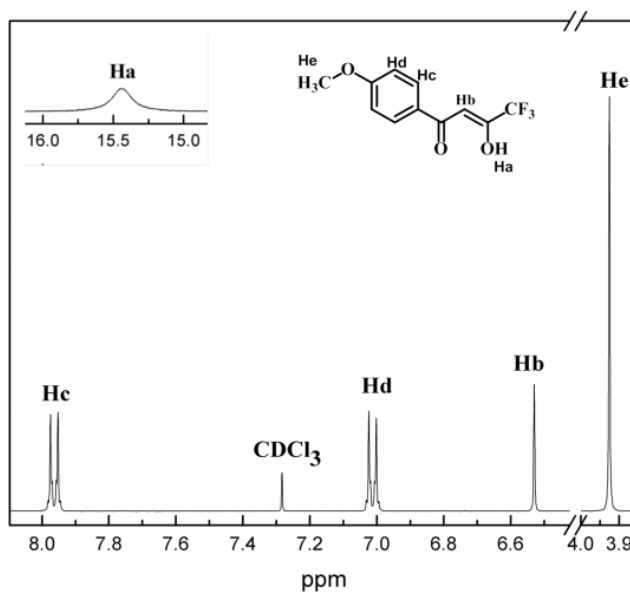

Fig. S1 400 MHz  $^1\text{H}$  NMR spectrum of MBTF in  $\text{CDCl}_3$ .

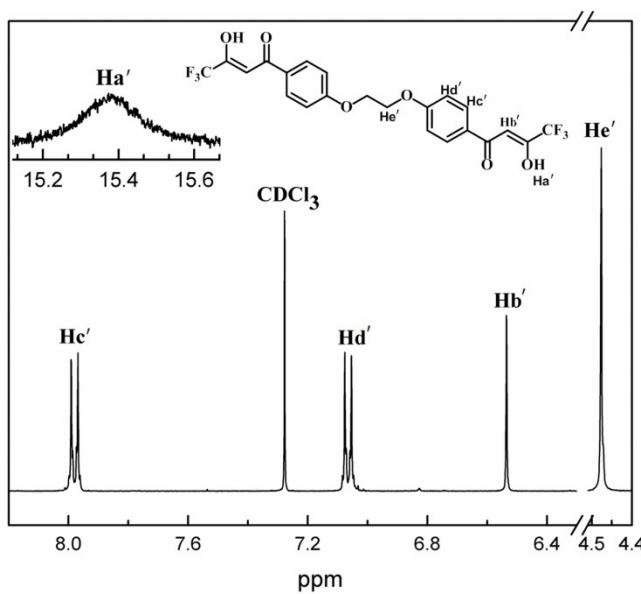

Fig. S2 400 MHz  $^1\text{H}$  NMR spectrum of BTPE in  $\text{CDCl}_3$ .

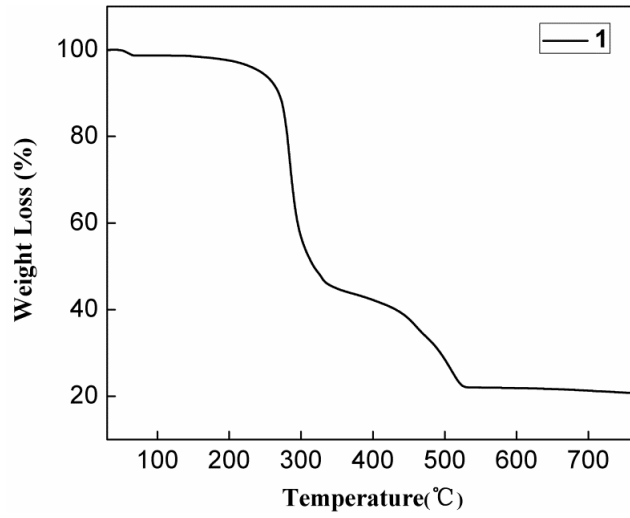

**Fig. S3** Thermogravimetric curve of **1**.

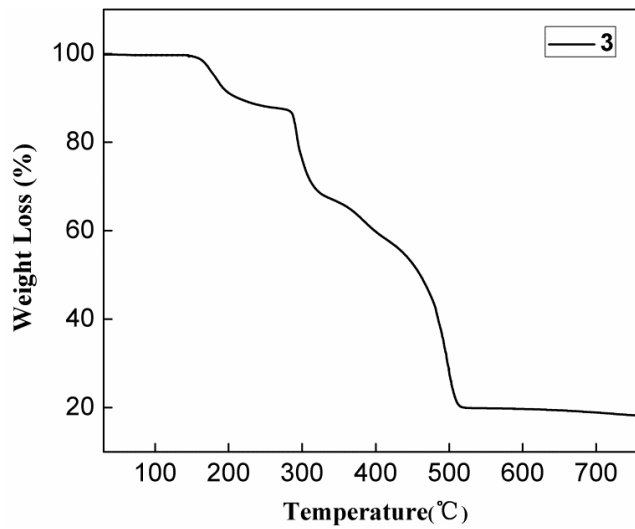

**Fig. S4** Thermogravimetric curve of **3**.

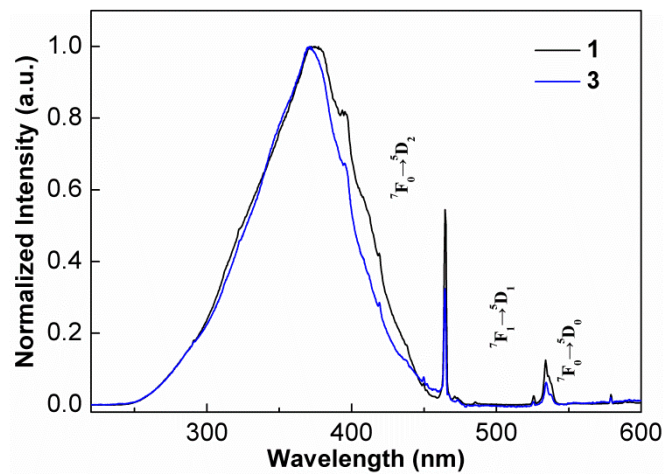

**Fig. S5** Solid state excitation spectra of **1** and **3**

**Table S1** Hydrogen bonds for complex **1** (Å and deg)

| D-H...A            | d(D...A) | <(DHA) |
|--------------------|----------|--------|
| O(7)-H(1)...O(3)#1 | 2.747(5) | 157.6  |
| O(7)-H(2)...O(1)#1 | 2.915(6) | 125.6  |

Symmetry transformations used to generate equivalent atoms: #1 1-x, 2-y, -z

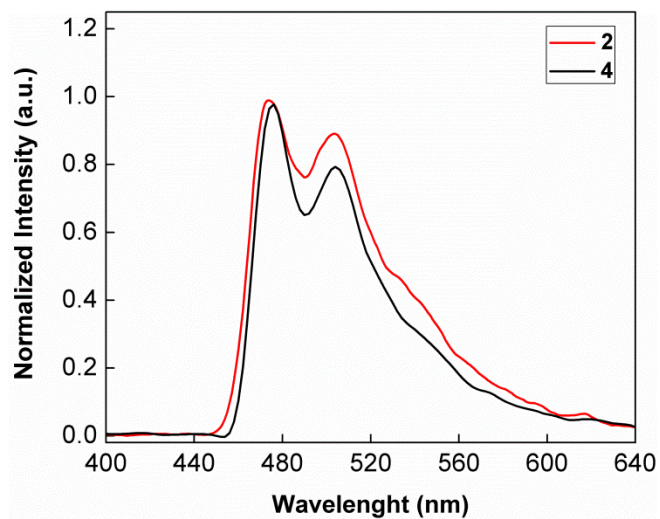

**Fig. S6** Phosphorescence spectra of the complexes **2** and **4** at 77 K.

**Table S2** Crystal data and structural refinement for complexes **1** and **3**.

|                                                                | <b>1</b>                                                           | <b>3</b>                                                                                       |
|----------------------------------------------------------------|--------------------------------------------------------------------|------------------------------------------------------------------------------------------------|
| formula                                                        | C <sub>35</sub> H <sub>32</sub> F <sub>9</sub> O <sub>11</sub> SEu | C <sub>74</sub> H <sub>66</sub> F <sub>18</sub> O <sub>22</sub> S <sub>4</sub> Eu <sub>2</sub> |
| Mr                                                             | 983.63                                                             | 2081.43                                                                                        |
| color                                                          | colorless                                                          | colorless                                                                                      |
| cryst syst                                                     | triclinic                                                          | monoclinic                                                                                     |
| space group                                                    | <i>P</i> -1                                                        | <i>C</i> 2/ <i>c</i>                                                                           |
| <i>a</i> (Å)                                                   | 11.1497(5)                                                         | 22.453(2)                                                                                      |
| <i>b</i> (Å)                                                   | 13.5201(5)                                                         | 23.9254(14)                                                                                    |
| <i>c</i> (Å)                                                   | 14.2594(7)                                                         | 19.4634(17)                                                                                    |
| $\alpha$ (deg)                                                 | 75.358(4)                                                          | 90                                                                                             |
| $\beta$ (deg)                                                  | 74.280(4)                                                          | 122.737(12)                                                                                    |
| $\gamma$ (deg)                                                 | 83.906(3)                                                          | 90                                                                                             |
| <i>V</i> (Å <sup>3</sup> )                                     | 2000.30(15)                                                        | 8794.9(13)                                                                                     |
| <i>Z</i>                                                       | 2                                                                  | 4                                                                                              |
| $\rho$ (g cm <sup>3</sup> )                                    | 1.633                                                              | 1.572                                                                                          |
| $\mu$ (mm <sup>-1</sup> )                                      | 1.717                                                              | 1.613                                                                                          |
| <i>F</i> (000)                                                 | 980                                                                | 4152                                                                                           |
| <i>R</i> <sub>1</sub> , [ <i>I</i> > 2 $\sigma$ ( <i>I</i> )]  | 0.0468                                                             | 0.0659                                                                                         |
| <i>wR</i> <sub>2</sub> , [ <i>I</i> > 2 $\sigma$ ( <i>I</i> )] | 0.1110                                                             | 0.1658                                                                                         |
| <i>R</i> <sub>1</sub> , (all data)                             | 0.0741                                                             | 0.1087                                                                                         |
| <i>wR</i> <sub>2</sub> , (all date)                            | 0.1314                                                             | 0.2059                                                                                         |
| GOF on <i>F</i> <sup>2</sup>                                   | 1.018                                                              | 1.028                                                                                          |
